# Supplementary material for: Social Information Embedded in Vocalizations Induces Neurogenomic and Behavioral Responses
Source: PLOS journal article supplement (doi:10.1371/journal.pone.0112905), 2014-11-10
Supplement: S1 (10.1371/journal.pone.0112905.s001) [file journal.pone.0112905.s001.pdf › journal.pone.0112905.s001.pdf]

Table S1. Popular and Unpopular acoustic traits.

|           | Mean           |            |           |                   |             |                 |                | Variance       |           |            |                 |                |                  |
|-----------|----------------|------------|-----------|-------------------|-------------|-----------------|----------------|----------------|-----------|------------|-----------------|----------------|------------------|
|           | Amplitude (dB) | Pitch (Hz) | FM (deg)  | AM^2 (1/ms)       | Entropy     | Pitch, goodness | Frequency (Hz) | Pitch (Hz)     | FM (deg)  | Entropy    | Pitch, goodness | Frequency (Hz) | AM               |
| Popular   | 47.9±5.6       | 1029±74    | 38.3±6.6  | -0.00098±0.00048  | -1.71±0.36  | 230.85±33.7     | 2811.5±679     | 1148000±644000 | 648±52    | 0.545±0.13 | 37900±7600      | 342000±240000  | 0.005885±0.00135 |
| Unpopular | 51.25±6.3      | 1254±540   | 40.15±5.5 | -0.001055±0.00035 | -2.175±0.07 | 233±162.2       | 3318.5±111     | 2084500±45000  | 622.5±217 | 1.28±1.68  | 41200±59000     | 539000±56000   | 0.006395±0.00165 |

Values are means ± range for the two Popular and Unpopular songs.
